# Supplementary material
Source: publisher site journal article supplement (https://www.dovepress.com/article/437026)
Supplement: Supplementary file 1 [file get_supplementary_file.php]

| Table S1 The distribution of gene mutations associated with rifampicin resistance. | | | |
| --- | --- | --- | --- |
| *rpoB* mutation  (codon position) |  | No. of isolates with  resistant phenotype | No. of isolates with  sensitivity phenotype |
| H445D |  | 4 |  |
| H445Y |  | 2 |  |
| L430P |  | 0 | 2 |
| L452P |  | 0 | 3 |
| S450L |  | 9 |  |
| S450L+I480V |  | 3 |  |
| Total |  | 18 | 5 |

Table S2 The distribution of gene mutations associated with isoniazid resistance

| *katG* mutation  (codon position) | | *fabG1* mutation  (codon position) | No. of isolates with  resistant phenotype | No. of isolates with  sensitivity phenotype |
| --- | --- | --- | --- | --- |
| S315T |  | 15 | 1 |
| S315N |  | 1 |  |
|  | c.-15C>T |  | 1 |
| Total |  | 16 | 2 |


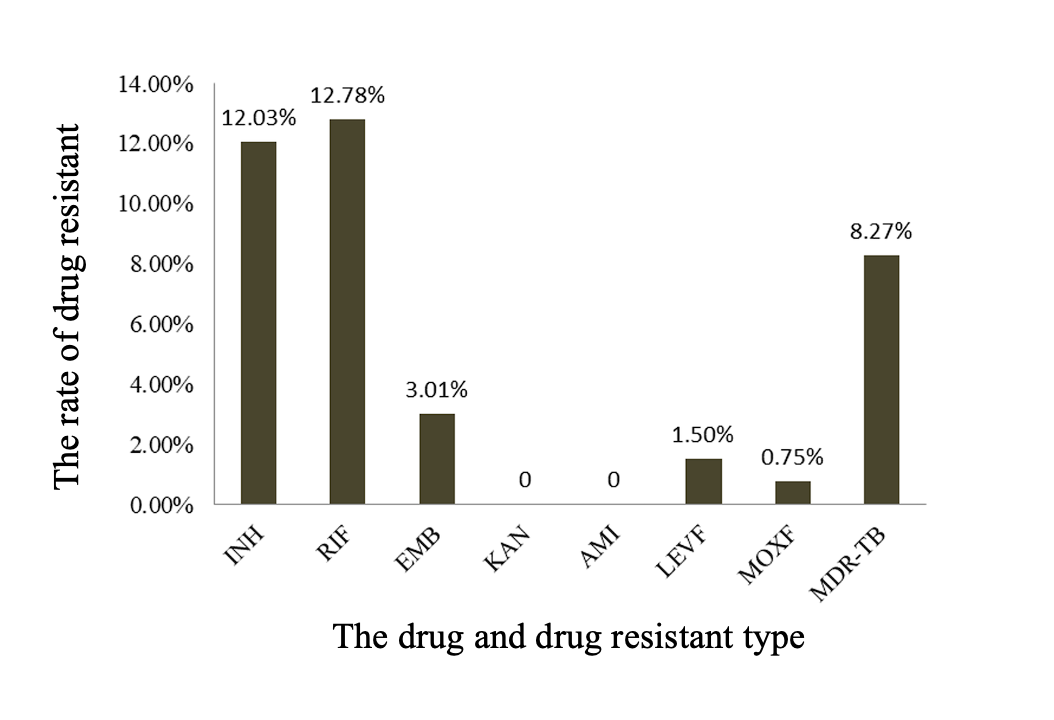


Figure S1. The rate of drug resistant among 133 *Mtb* strains in this study.
